# Supplementary material for: Development of a Physiologically Based Pharmacokinetic Model for Tegoprazan: Application for the Prediction of Drug–Drug Interactions with CYP3A4 Perpetrators
Source: MDPI journal article supplement (doi:10.3390/pharmaceutics15010182), 2023-01-04
Supplement: s1 [file s1]

# Development of a Physiologically Based Pharmacokinetic Model for Tegoprazan: Application for the Prediction of Drug–Drug Interactions with CYP3A4 Perpetrators

Lien Thi Ngo <sup>†</sup>, Jaeyeon Lee <sup>†</sup>, Hwi-yeol Yun <sup>\*</sup> and Jung-woo Chae <sup>\*</sup>

College of Pharmacy, Chungnam National University, Daejeon 34134, Republic of Korea;  
lienngovn@cnu.ac.kr (L.T.N.); jaeyeon.lee@o.cnu.ac.kr (J.L.)

<sup>\*</sup> Correspondence: hyyun@cnu.ac.kr (H.-y.Y.); jwchae@cnu.ac.kr (J.-w.C.)

<sup>†</sup> These authors contributed equally to this work as the first authors.

**Table S1** Observed and Predicted pharmacokinetics parameters of **tegoprazan** following the administration of tegoprazan in humans

| Training dataset |           | $AUC_{inf}$ (ng×h/mL) |           |       | $C_{max}$ (ng/mL) |           |       | References           | Description                                    |
|------------------|-----------|-----------------------|-----------|-------|-------------------|-----------|-------|----------------------|------------------------------------------------|
| Study ID         | Dose (mg) | Observed              | Predicted | Ratio | Observed          | Predicted | Ratio |                      |                                                |
| ID 01            | 50        | 2107.1                | 2843.5    | 1.35  | 567.4             | 523.3     | 0.92  | Han et al. 2017 [1]  | Single dose                                    |
| ID 04            | 400       | 26288.3               | 23049.4   | 0.88  | 4854.1            | 3657.6    | 0.75  | Han et al. 2017 [1]  | Single dose                                    |
| ID 05            | 100       | 6763.6                | 5951.7    | 0.88  | 1380.4            | 1089.5    | 0.79  | Han et al. 2017 [1]  | Multiple, first dose                           |
| ID 05            | 100       | 4148.1                | 6145.7    | 1.48  | 705.0             | 1124.9    | 1.60  | Han et al. 2017 [1]  | Multiple, last dose                            |
| ID 07            | 100       | 6223.4                | 6053.2    | 0.97  | 1227.0            | 1094.9    | 0.89  | Hwang et al. [2]     | Single dose                                    |
| ID 08            | 100       | 7737.2                | 7672.1    | 0.99  | 976.8             | 1212.9    | 1.24  | Ghim et al. 2021 [3] | Multiple doses, tegoprazan alone               |
| ID 09            | 100       | 23755.1               | 23909.4   | 1.01  | 2256.1            | 2113.4    | 0.94  | Ghim et al. 2021 [3] | Multiple doses, tegoprazan with clarithromycin |
| ID 12            | 200       | 11109.3               | 12445.1   | 1.12  | 2535.6            | 2612.9    | 1.03  | He et al. 2021 [4]   | Single dose                                    |
| ID 14            | 50        | 3813.8                | 2919.4    | 0.77  | 635.2             | 537.4     | 0.85  | Yoon et al. 2021 [5] | Single dose                                    |
| ID 17            | 50        | 3693.6                | 3218.9    | 0.87  | 538.7             | 566.8     | 1.05  | Jeon et al. 2021 [6] | Multiple doses                                 |
| ID 19            | 200       | 7516.5                | 8725.3    | 1.16  | 910.5             | 644.6     | 0.71  | Han et al. 2021 [7]  | Single dose, fed                               |

  

| Test dataset |           | $AUC_{inf}$ (ng×h/mL) |           |       | $C_{max}$ (ng/mL) |           |       | References           | Description          |
|--------------|-----------|-----------------------|-----------|-------|-------------------|-----------|-------|----------------------|----------------------|
| Study ID     | Dose (mg) | Observed              | Predicted | Ratio | Observed          | Predicted | Ratio |                      |                      |
| ID 02        | 100       | 5651.4                | 5903.1    | 1.04  | 1227.4            | 1046.5    | 0.85  | Han et al. 2017 [1]  | Single dose          |
| ID 03        | 200       | 10358.2               | 11851.6   | 1.14  | 2480.2            | 2122.5    | 0.86  | Han et al. 2017 [1]  | Single dose          |
| ID 06        | 200       | 10325.5               | 11947.1   | 1.16  | 2789.2            | 2235.0    | 0.80  | Han et al. 2017 [1]  | Multiple, first dose |
| ID 06        | 200       | 10244.6               | 12717.2   | 1.24  | 1150.4            | 2303.3    | 2.00  | Han et al. 2017 [1]  | Multiple, last dose  |
| ID 10        | 50        | 3152.1                | 3061.5    | 0.97  | 715.6             | 615.2     | 0.86  | He et al. 2021 [4]   | Single dose          |
| ID 11        | 100       | 5709.6                | 6093.2    | 1.07  | 1275.6            | 1217.5    | 0.95  | He et al. 2021 [4]   | Single dose          |
| ID 13        | 100       | 6943.5                | 6409.9    | 0.92  | 978.5             | 1248.0    | 1.28  | He et al. 2021 [4]   | Multiple doses       |
| ID 15        | 50        | 3417.9                | 2919.4    | 0.85  | 670.3             | 537.4     | 0.80  | Yoon et al. 2021 [5] | Single dose, fasted  |
| ID 16        | 50        | 3629.1                | 2896.9    | 0.80  | 327.4             | 331.7     | 1.01  | Yoon et al. 2021 [5] | Single dose, fed     |
| ID 18        | 200       | 8455.4                | 11673.9   | 1.38  | 1898.7            | 2122.5    | 1.12  | Han et al. 2021 [7]  | Single dose, fasted  |

$AUC_{inf}$ , area under the concentration-time curve;  $C_{max}$ , maximum concentration

**Table S2** Observed and Predicted pharmacokinetics parameters of **the metabolite M1** following the administration of tegoprazan in humans

| Training dataset   |                        | $AUC_{inf}$ (ng×h/mL) |           |       | $C_{max}$ (ng/mL) |           |       | References           | Description                                    |
|--------------------|------------------------|-----------------------|-----------|-------|-------------------|-----------|-------|----------------------|------------------------------------------------|
| Study ID           | Dose (mg) <sup>#</sup> | Observed              | Predicted | Ratio | Observed          | Predicted | Ratio |                      |                                                |
| ID 07              | 100                    | 9058.2                | 9642.8    | 1.06  | 395.6             | 307.6     | 0.78  | Hwang et al. [2]     | Single dose                                    |
| ID 08              | 100                    | 23865.9               | 23521.0   | 0.99  | 1211.2            | 855.4     | 0.71  | Ghim et al. 2021 [3] | Multiple doses, tegoprazan alone               |
| ID 09 <sup>‡</sup> | 100                    | 66841.0               | 47842.4   | 0.72  | 2696.4            | 1407.9    | 0.52  | Ghim et al. 2021 [3] | Multiple doses, tegoprazan with clarithromycin |
| ID 12              | 200                    | 16838.8               | 19513.8   | 1.16  | 958.1             | 731.1     | 0.76  | He et al. 2021 [4]   | Single dose                                    |
| ID 14              | 50                     | 5230.4                | 4677.0    | 0.89  | 183.5             | 146.2     | 0.80  | Yoon et al. 2021 [5] | Single dose                                    |
| ID 17              | 50                     | 4621.8                | 4700.5    | 1.02  | 135.9             | 145.5     | 1.07  | Jeon et al. 2021 [6] | Multiple doses                                 |
| ID 19              | 200                    | 9222.7                | 12210.753 | 1.32  | 303.1             | 367.5     | 1.21  | Han et al. 2021 [7]  | Single dose, fed                               |
| Test dataset       |                        | $AUC_{inf}$ (ng×h/mL) |           |       | $C_{max}$ (ng/mL) |           |       | References           | Description                                    |
| Study ID           | Dose (mg) <sup>#</sup> | Observed              | Predicted | Ratio | Observed          | Predicted | Ratio |                      |                                                |
| ID 10              | 50                     | 4430.7                | 4832.7    | 1.09  | 243.5             | 185.1     | 0.76  | He et al. 2021 [4]   | Single dose                                    |
| ID 11              | 100                    | 7678.0                | 9680.7    | 1.26  | 493.2             | 360.1     | 0.73  | He et al. 2021 [4]   | Single dose                                    |
| ID 13              | 100                    | 12013.9               | 13693.9   | 1.14  | 547.8             | 551.4     | 1.01  | He et al. 2021 [4]   | Multiple doses                                 |
| ID 15              | 50                     | 4317.6                | 4677.0    | 1.08  | 144.0             | 146.2     | 1.02  | Yoon et al. 2021 [5] | Single dose, fasted                            |
| ID 16              | 50                     | 4621.8                | 4700.5    | 1.02  | 135.9             | 145.5     | 1.07  | Yoon et al. 2021 [5] | Single dose, fed                               |
| ID 18              | 200                    | 11692.8               | 18847.8   | 1.61  | 586.0             | 569.5     | 0.97  | Han et al. 2021 [7]  | Single dose, fasted                            |

$AUC_{inf}$ , area under the concentration-time curve;  $C_{max}$ , maximum concentration

<sup>#</sup> Dose of tegoprazan; <sup>‡</sup>this dataset was not used for the model development.

## References

1. Han, S.; Choi, H.Y.; Kim, Y.H.; Nam, J.Y.; Kim, B.; Song, G.S.; Lim, H.-S.; Bae, K.-S. Randomised clinical trial: safety, tolerability, pharmacokinetics, and pharmacodynamics of single and multiple oral doses of tegoprazan (CJ-12420), a novel potassium-competitive acid blocker, in healthy male subjects. *Aliment. Pharmacol. Ther.* **2019**, *50*, 751–759, doi:10.1111/apt.15438.
2. Hwang, J.G.; Yoo, H.; Lee, J.W.; Song, G.S.; Lee, S.; Kim, M.-G. Comparison of pharmacokinetic characteristics of two Tegoprazan (CJ-12420) formulations in healthy male subjects. *Transl. Clin. Pharmacol.* **2019**, *27*, 80, doi:10.12793/tcp.2019.27.2.80.
3. Ghim, J.; Chin, M.C.; Jung, J.; Lee, J.; Kim, S.; Kim, B.; Song, G.S.; Choi, Y.; Shin, J. Pharmacokinetics and Pharmacodynamics of Tegoprazan Coadministered With Amoxicillin and Clarithromycin in Healthy Subjects. *J. Clin. Pharmacol.* **2021**, *61*, 913–922, doi:10.1002/jcph.1805.
4. He, J.; Cao, G.; Yu, J.; Wang, J.; Cheng, N.; Wu, J.; Zhang, J.; Wu, X.; Zhang, B.; Lu, J.; et al. Safety, Tolerability and Pharmacokinetics of Single Ascending and Multiple Oral Doses of Tegoprazan in Healthy Chinese Subjects. *Clin. Drug Investig.* **2021**, *41*, 89–97, doi:10.1007/s40261-020-00986-4.
5. Yoon, D.Y.; Sunwoo, J.; Shin, N.; Kim, A.R.; Kim, B.; Song, G.S.; Jang, I.; Lee, S. Effect of meal timing on pharmacokinetics and pharmacodynamics of tegoprazan in healthy male volunteers. *Clin. Transl. Sci.* **2021**, *14*, 934–941, doi:10.1111/cts.12958.
6. Jeon, J.-Y.; Kim, S.-Y.; Moon, S.J.; Oh, K.; Lee, J.; Kim, B.; Song, G.S.; Kim, M.-G. Pharmacokinetic Interactions between Tegoprazan and Metronidazole/Tetracycline/Bismuth and Safety Assessment in Healthy Korean Male Subjects. *Clin. Ther.* **2021**, *43*, 722–734, doi:10.1016/j.clinthera.2021.01.026.
7. Han, S.; Choi, H.Y.; Kim, Y.H.; Nam, J.Y.; Kim, B.; Song, G.S.; Lim, H.-S.; Bae, K.-S. Effect of Food on the Pharmacokinetics and Pharmacodynamics of a Single Oral Dose of Tegoprazan. *Clin. Ther.* **2021**, *43*, 1371–1380, doi:10.1016/j.clinthera.2021.06.007.
